# Supplementary material for: [Ru]-Catalyzed olefin metathesis and ethenolysis for the synthesis and recycling of bio-based polycarbonates and polycyanurates
Source: Royal Society of Chemistry journal article supplement (doi:10.1039/d4py00940a), 2024-11-04
Supplement: d4py00940a1.pdf [file d4py00940a1.pdf]

Supporting Information for

**[Ru]-Catalyzed Olefin Metathesis and Ethenolysis for the Synthesis and Recycling of Bio-Based Polycarbonates and Polycyanurates**

Dana M. Pinson, Francesca D. Eckstrom, Gregory S. Ostrom, Randall K. McClain, Lawrence C. Baldwin, and Benjamin G. Harvey\*

US NAVY, NAWCWD, Research Department, Chemistry Division, China Lake, California 93555

\*Corresponding author (email: benjamin.g.harvey.civ@us.navy.mil)

**Contents**

|                                                                                                                                                                                                                                                                                                                                                                               |     |
|-------------------------------------------------------------------------------------------------------------------------------------------------------------------------------------------------------------------------------------------------------------------------------------------------------------------------------------------------------------------------------|-----|
| <b>Figure S1.</b> (a) Synthesis of 4,4'-(2-butene-1,4-diyl)bis[2-methoxyphenol] as previously reported. (b) <sup>1</sup> H NMR spectrum of 4,4'-(2-butene-1,4-diyl)bis[2-methoxyphenol]. (c) Crystal structure of 4,4'-(2-butene-1,4-diyl)bis[2-methoxyphenol] .....                                                                                                          | S3  |
| <b>Figure S2.</b> <sup>13</sup> C NMR of bis(4-allyl-2-methoxyphenyl) carbonate (compound 2).....                                                                                                                                                                                                                                                                             | S4  |
| <b>Figure S3.</b> <sup>13</sup> C NMR of 4-Allyl-1-cyano-2-methoxybenzene (compound 3) .....                                                                                                                                                                                                                                                                                  | S4  |
| <b>Figure S4.</b> <sup>13</sup> C NMR of 2,4,6-tris(4-allyl-2-methoxyphenoxy)-1,3,5-triazine (compound 4).....                                                                                                                                                                                                                                                                | S4  |
| <b>Figure S5.</b> ATR FTIR spectrum of eugenol-based polycarbonate. ....                                                                                                                                                                                                                                                                                                      | S5  |
| <b>Figure S6.</b> GPC of polycarbonate ethenolysis products from all trials, PC1 refers to starting material and letters refer to line entries in table 2. ....                                                                                                                                                                                                               | S6  |
| <b>Figure S7.</b> GPC results from the depolymerization of eugenol-based polycarbonate oligomers to yield monomeric material. ....                                                                                                                                                                                                                                            | S7  |
| <b>Figure S8.</b> <sup>1</sup> H NMR spectra of the 2 <sup>nd</sup> round of re- and de-polymerization for the triazine network. (a) <sup>1</sup> H NMR spectrum of the repolymerized network. (b) <sup>1</sup> H NMR spectrum of the oligomeric depolymerization product. (c) <sup>1</sup> H NMR spectrum of monomer obtained via ethenolysis of oligomers. S8               | S8  |
| <b>Figure S9.</b> GPC results for a repolymerized triazine network and monomer resulting from full depolymerization. ....                                                                                                                                                                                                                                                     | S9  |
| <b>Figure S10.</b> <sup>1</sup> H NMR spectrum of the 3 <sup>rd</sup> round of re- and de-polymerization for the triazine network. (a) <sup>1</sup> H NMR spectrum of repolymerized triazine. (b) <sup>1</sup> H NMR spectrum of oligomers obtained by ethenolysis of the network. (c) <sup>1</sup> H NMR spectrum of the monomer obtained via ethenolysis of oligomers. .... | S10 |
| <b>Figure S11.</b> GPC results for the 3 <sup>rd</sup> round of re- and de-polymerization for the triazine network. ....                                                                                                                                                                                                                                                      | S11 |
| <b>X-ray Crystallography Data Collection and Refinement Details:</b> .....                                                                                                                                                                                                                                                                                                    | S12 |
| <b>Table S1.</b> Crystal data and structure refinement for (E)-4,4'-(But-2-ene-1,4-diyl)bis(2-methoxyphenol) (compound 1).....                                                                                                                                                                                                                                                | S12 |
| <b>Table S2.</b> Crystal data and structure refinement for Bis(4-allyl-2-methoxyphenyl) carbonate (compound 2).....                                                                                                                                                                                                                                                           | S13 |
| <b>Table S3.</b> Crystal data and structure refinement for 2,4,6-tris(4-allyl-2 methoxyphenoxy)-1,3,5-triazine (compound 4).....                                                                                                                                                                                                                                              | S14 |
| <b>Figure S12.</b> Solid-state structure of compound 1 with thermal ellipsoids at the 50% probability level. Hydrogen atoms are omitted for clarity. Grey and red ellipsoids represent C and O atoms, respectively. ....                                                                                                                                                      | S15 |
| <b>Figure S13.</b> Solid-state structure of compound 2 with thermal ellipsoids at the 50% probability level. Hydrogen atoms are omitted for clarity. Grey and red ellipsoids represent C and O atoms, respectively. ....                                                                                                                                                      | S15 |

**Figure S14.** Solid-state structure of compound **4** with thermal ellipsoids at the 50% probability level. Hydrogen atoms are omitted for clarity. Grey, blue and red ellipsoids represent C, N and O atoms, respectively.....S15

**References**.....S16

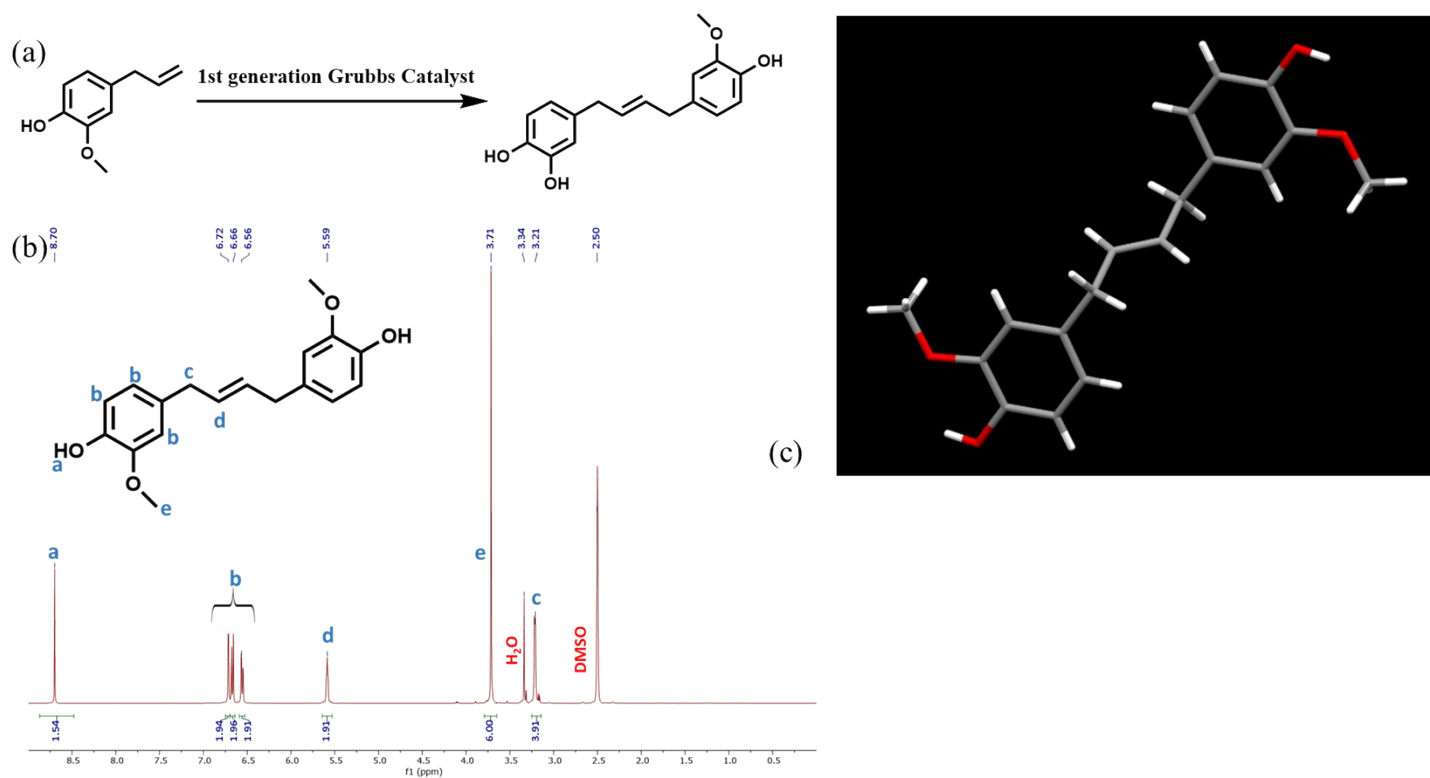

**Figure S1.** (a) Synthesis of 4,4'-(2-butene-1,4-diyl)bis[2-methoxyphenol] as previously reported. (b)  $^1\text{H}$  NMR spectrum of 4,4'-(2-butene-1,4-diyl)bis[2-methoxyphenol]. (c) X-ray crystal structure of 4,4'-(2-butene-1,4-diyl)bis[2-methoxyphenol]

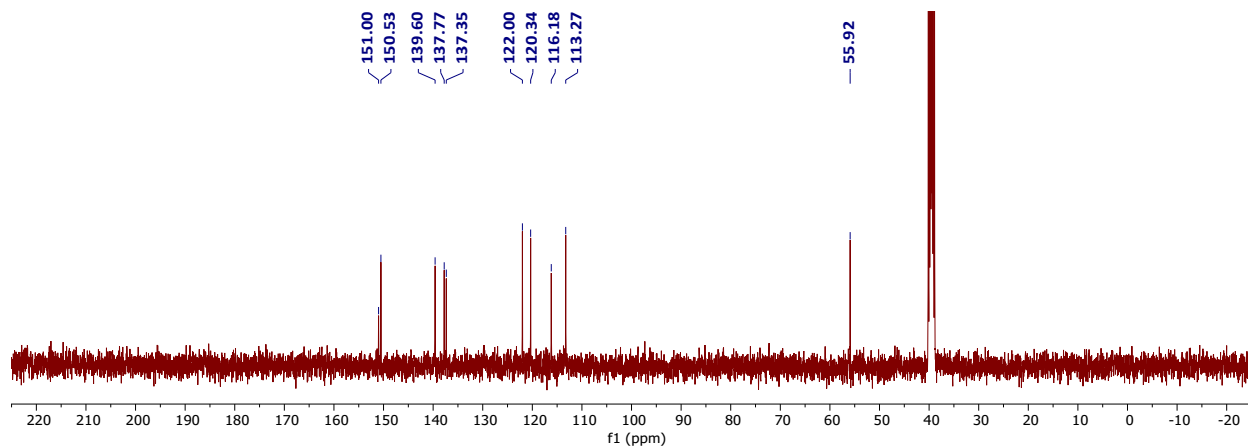

**Figure S2.**  $^{13}\text{C}$  NMR spectrum of bis(4-allyl-2-methoxyphenyl) carbonate (compound 2)

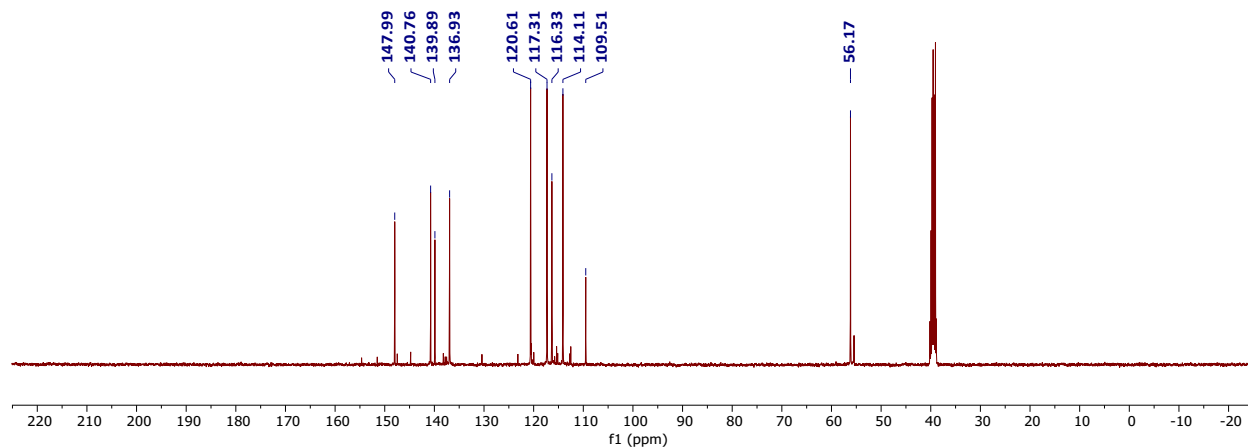

**Figure S3.**  $^{13}\text{C}$  NMR spectrum of 4-Allyl-1-cyano-2-methoxybenzene (compound 3)

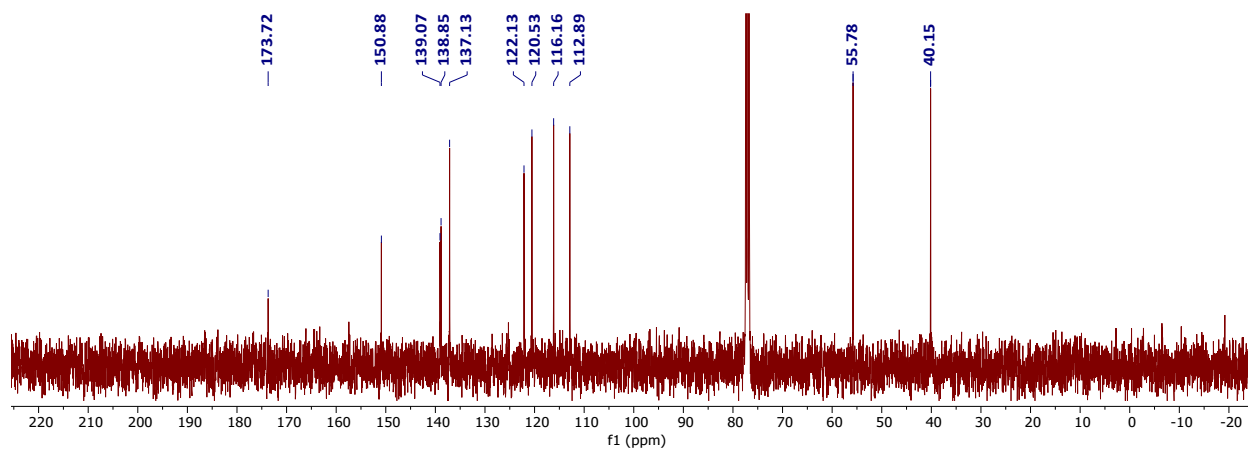

**Figure S4.**  $^{13}\text{C}$  NMR spectrum of 2,4,6-tris(4-allyl-2-methoxyphenoxy)-1,3,5-triazine (compound 4)

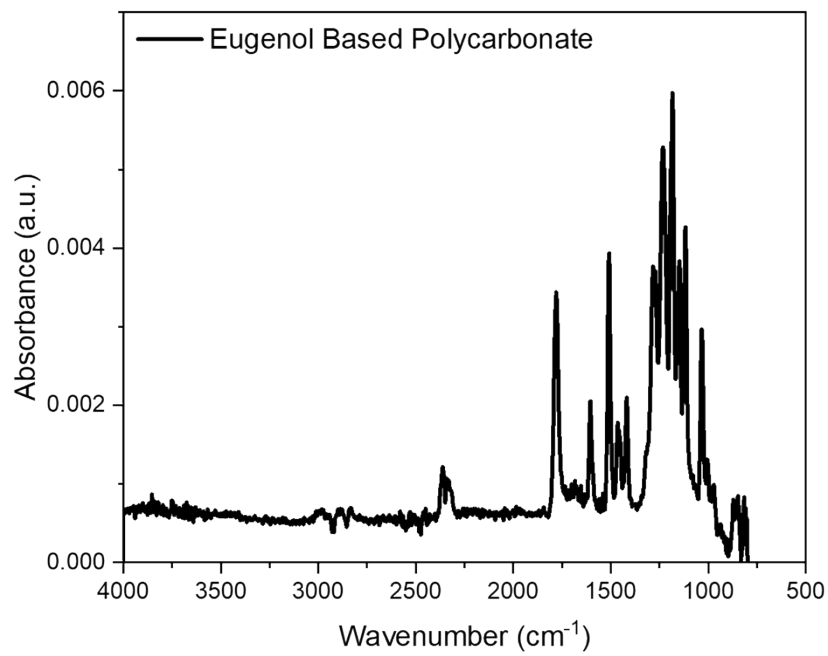

**Figure S5.** ATR FTIR spectrum of eugenol-based polycarbonate.

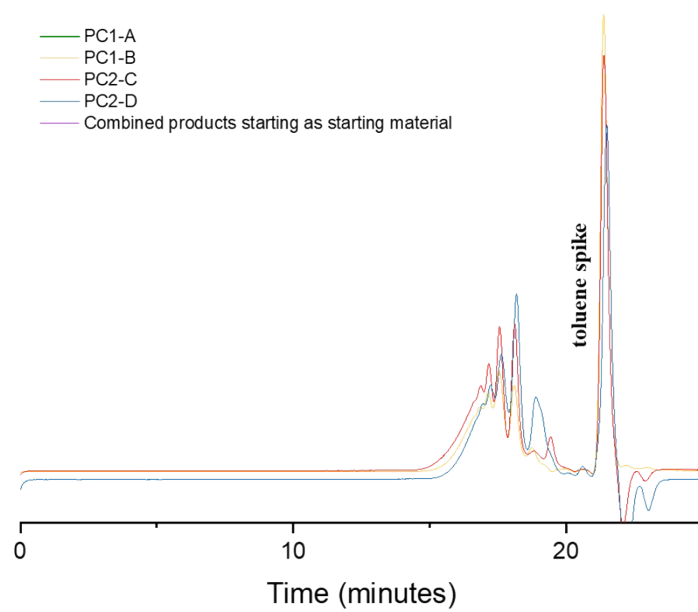

**Figure S6.** GPC of polycarbonate ethenolysis products from all trials, PC1 refers to starting material and letters refer to line entries in table 2.

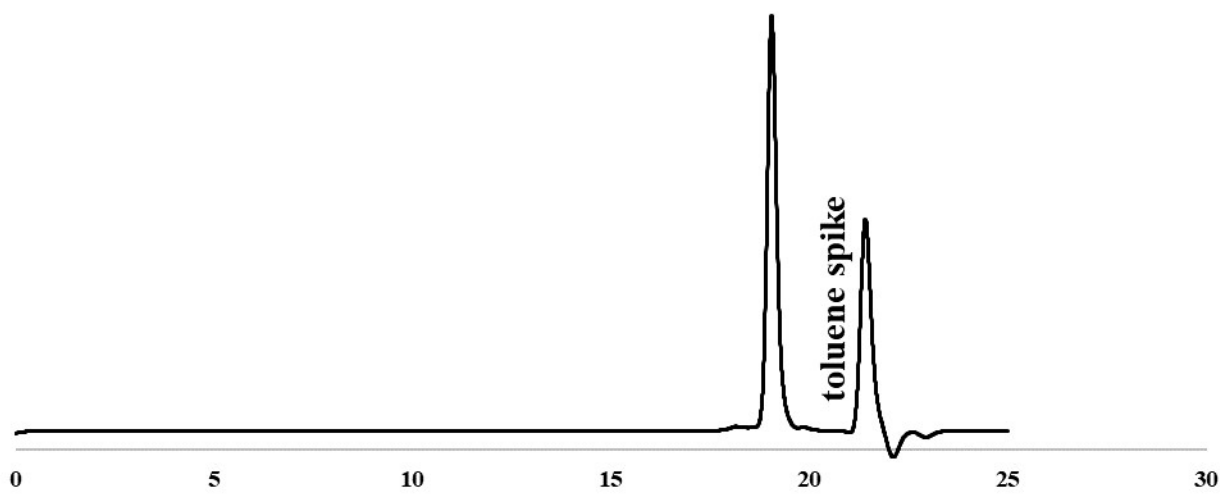

**Figure S7.** GPC results from the depolymerization of eugenol-based polycarbonate oligomers to yield monomeric material.

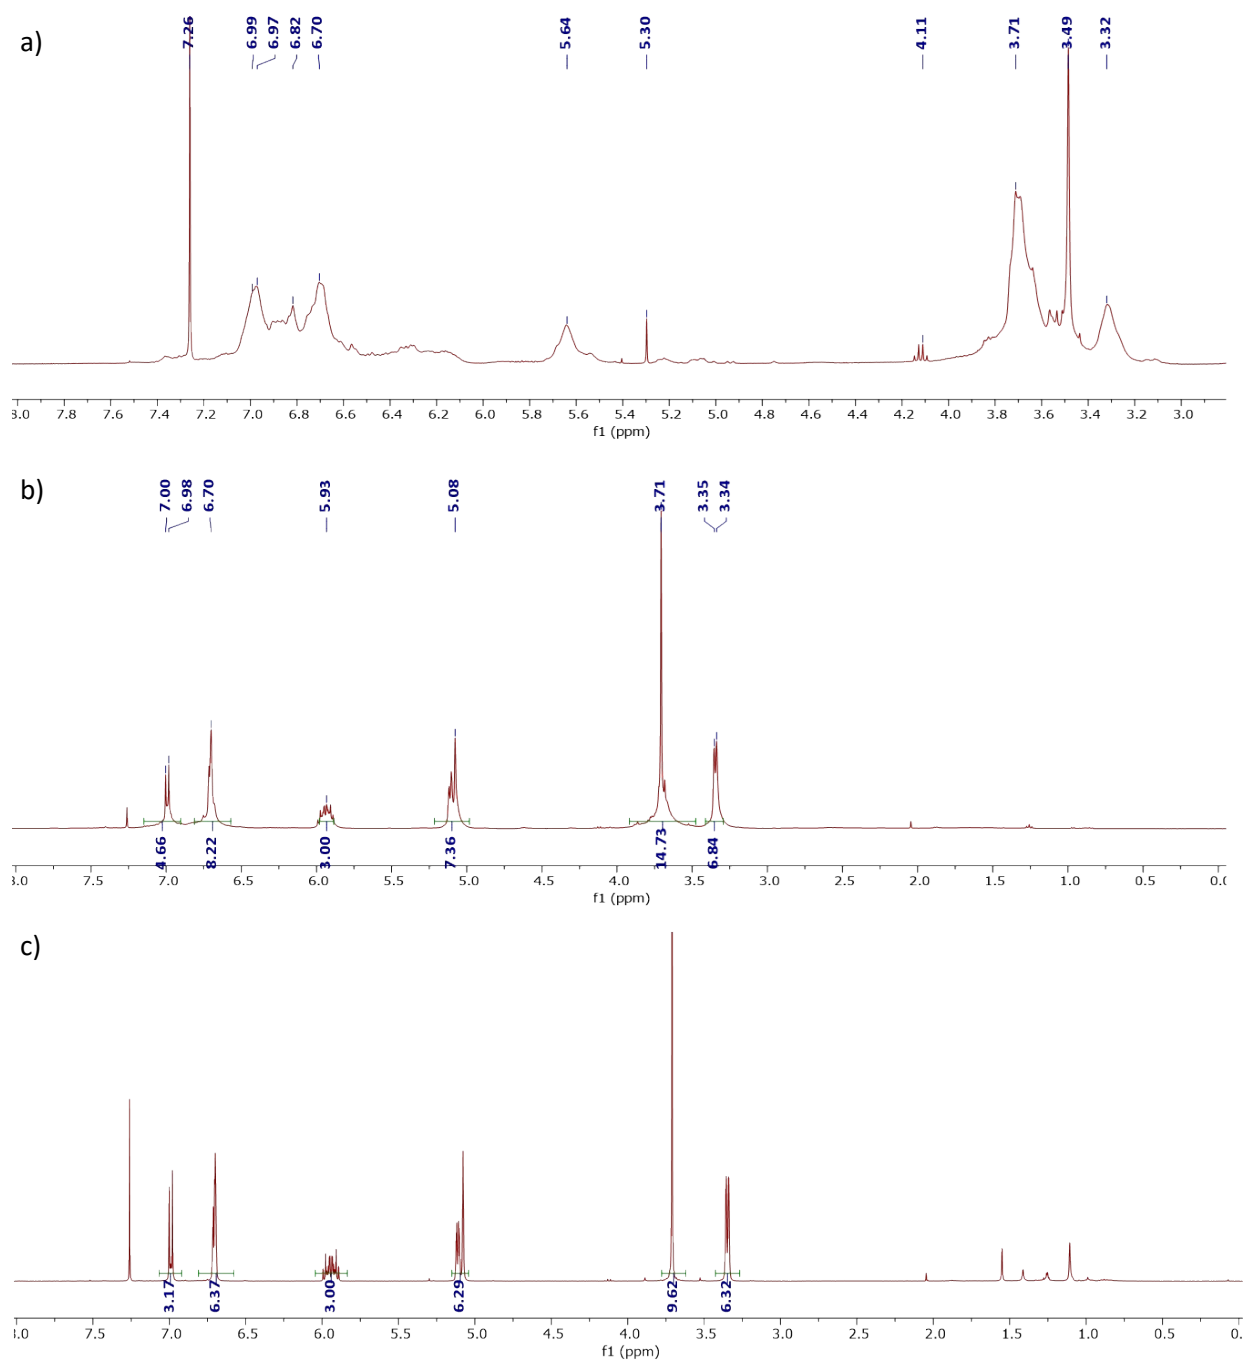

**Figure S8.**  $^1\text{H}$  NMR spectra of the 2<sup>nd</sup> round of re- and de-polymerization for the triazine network. (a)  $^1\text{H}$  NMR spectrum of the repolymerized network. (b)  $^1\text{H}$  NMR spectrum of the oligomeric depolymerization product. (c)  $^1\text{H}$  NMR spectrum of monomer obtained via ethenolysis of oligomers.



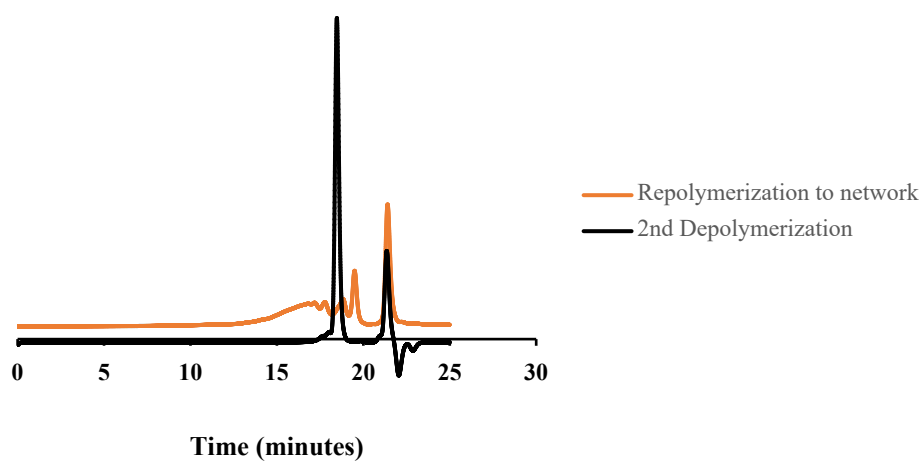

**Figure S9.** GPC results for a repolymerized triazine network and monomer resulting from full depolymerization.

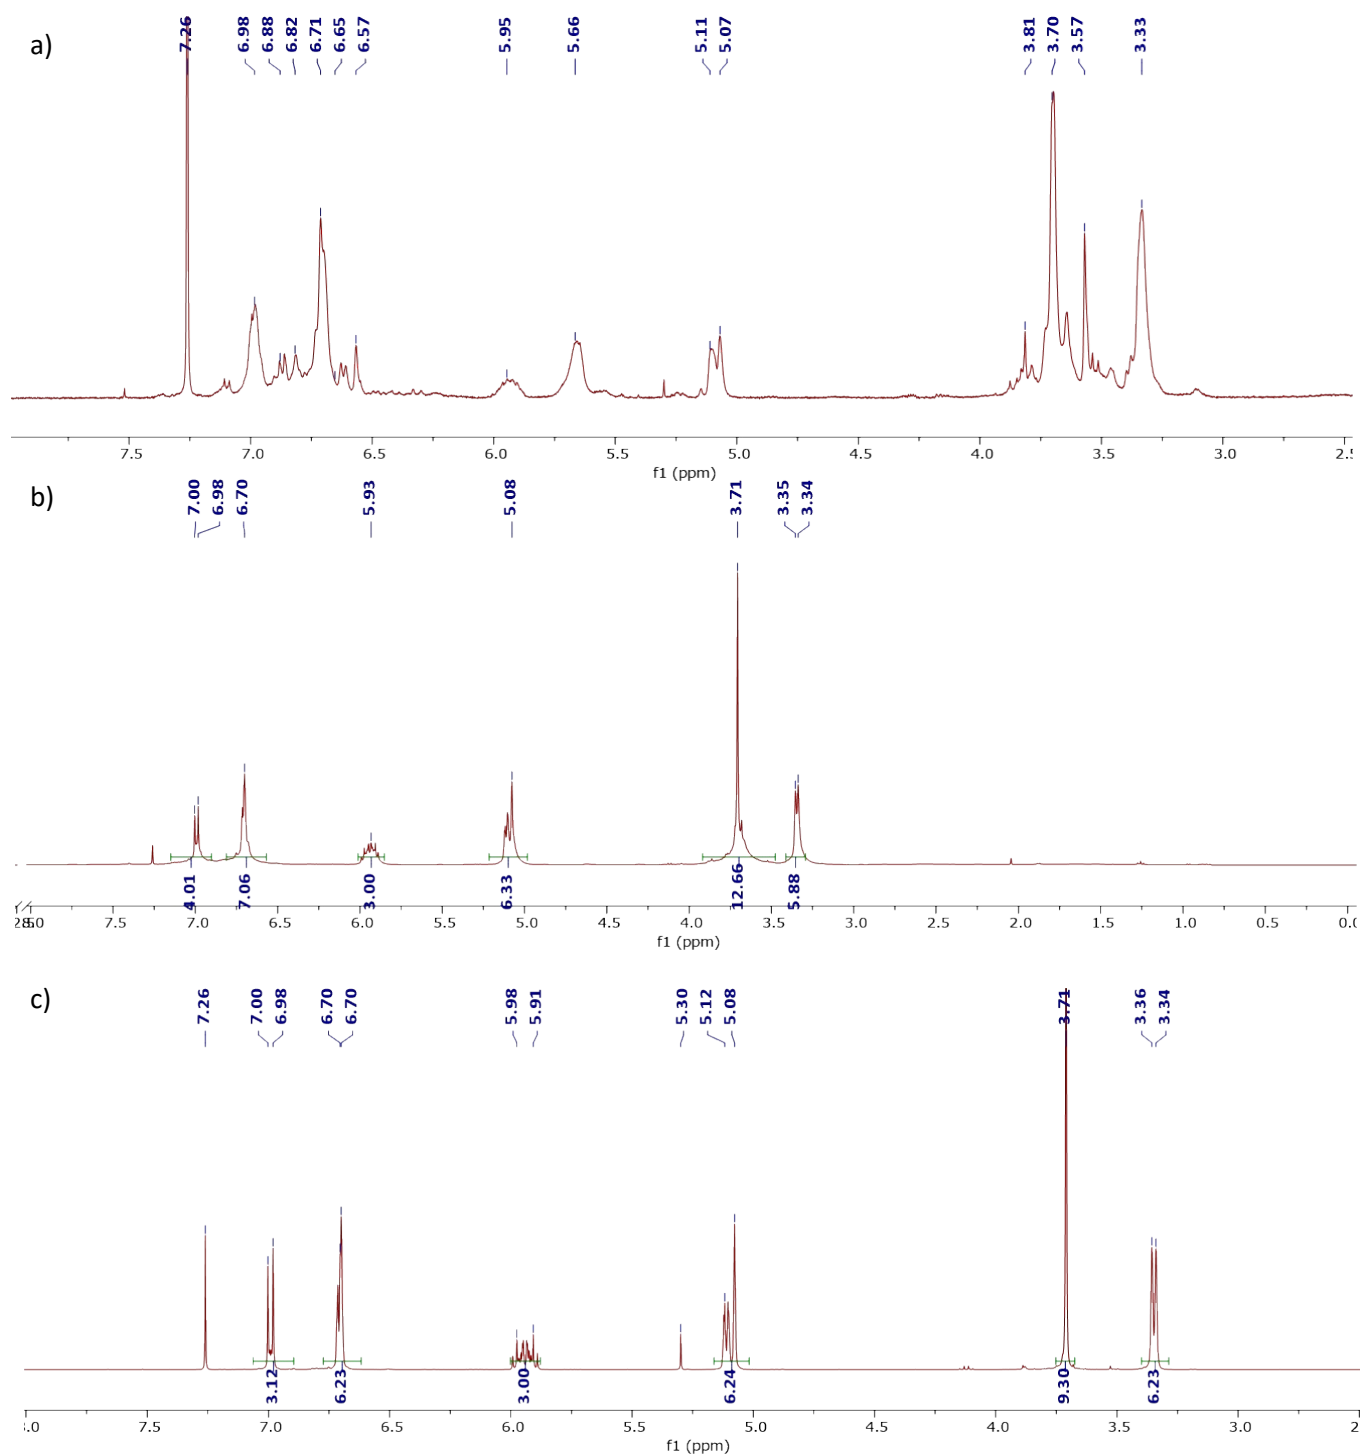

**Figure S10.**  $^1\text{H}$  NMR spectrum of the 3<sup>rd</sup> round of re- and de-polymerization for the triazine network. (a)  $^1\text{H}$  NMR spectrum of re-polymerized triazine. (b)  $^1\text{H}$  NMR spectrum of oligomers obtained by ethenolysis of the network. (c)  $^1\text{H}$  NMR spectrum of the monomer obtained via ethenolysis of oligomers.

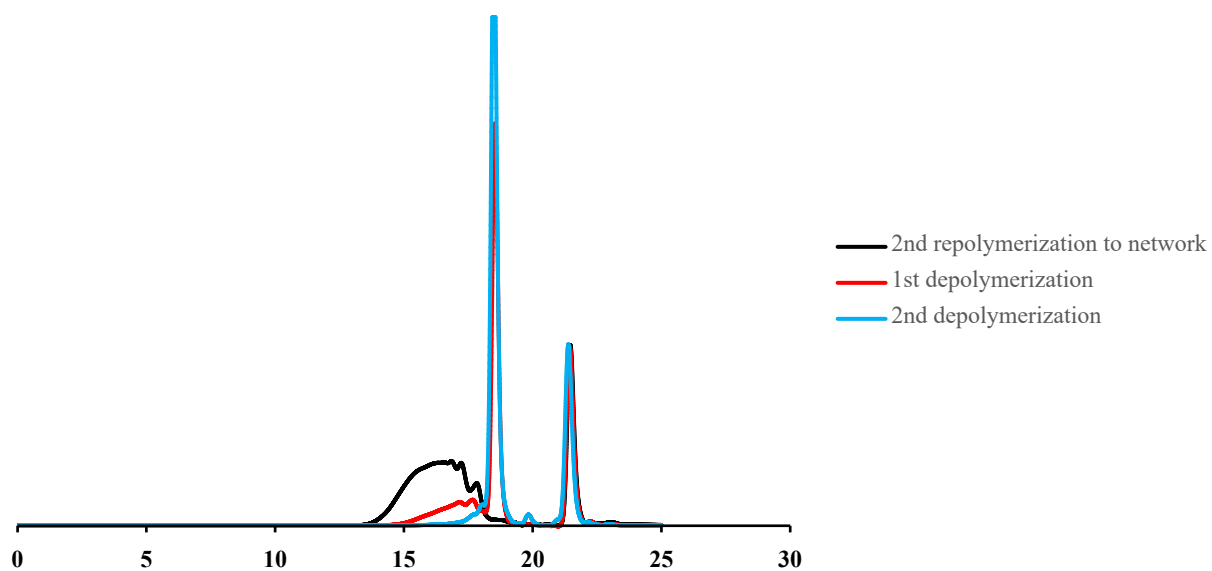

**Figure S11.** GPC results for the 3<sup>rd</sup> round of re- and de-polymerization for the triazine network.

### X-ray Crystallography Data Collection and Refinement Details:

Crystal Samples were coated with Parabar oil and mounted on a MiTeGen polyimide loop. X-ray intensity data were measured using a Bruker SMART Apex II diffractometer equipped with a PHOTON II detector. Data collection was performed at 100 K or 298 K under the N<sub>2</sub> stream of an Oxford Cryosystems Cryostream with MoK $\alpha$  (graphite monochromator) or CuK $\alpha$  radiation (I $\mu$ S source). The frames were integrated and scaling was performed using APEX3 software, including a multi-scan absorption correction.

Structure solutions were obtained with SHELXT using direct methods and refined via least-square refinement against F<sup>2</sup> by SHELXL, as implemented in OLEX2 crystallographic software.<sup>1-3</sup> All non-hydrogen atoms were refined anisotropically. All hydrogen atoms were placed on geometrically calculated positions using the riding model and refined isotropically.

*(E)-4,4'-(But-2-ene-1,4-diyl)bis(2-methoxyphenol)* (compound 1). This compound crystallized in the space group *Pbca* with half of a molecule in the asymmetric unit. Two reflections (0 2 1, 1 2 2) were omitted from the refinement, as they were likely affected by the beamstop during data collection. The low resolution of this data set (0.95 Å) resulted in one checkCIF A alert. Attempts to isolate single crystals that could yield higher resolution data were unsuccessful.

*Bis(4-allyl-2-methoxyphenyl) carbonate* (compound 2). This compound crystallized in the space group *C2/c* with half of a molecule in the asymmetric unit. No checkCIF level A or B alerts were found.

*2,4,6-tris(4-allyl-2-methoxyphenoxy)-1,3,5-triazine* (compound 4). This compound crystallized in the space group *P2<sub>1</sub>/n* with a full molecule in the asymmetric unit. Positive and negative residual density resulted in three checkCIF B alerts. This residual density could not be modelled as any chemically reasonable species and likely results from minor errors in the absorption correction.

**Table S1.** Crystal data and structure refinement for (E)-4,4'-(But-2-ene-1,4-diyl)bis(2-methoxyphenol) (compound 1).

|                                  |                                                |
|----------------------------------|------------------------------------------------|
| CCDC Deposition Number           | 2360344                                        |
| Empirical formula                | C <sub>18</sub> H <sub>20</sub> O <sub>4</sub> |
| Formula weight                   | 300.357                                        |
| Temperature/K                    | 298.00                                         |
| Crystal system                   | orthorhombic                                   |
| Space group                      | <i>Pbca</i>                                    |
| a/Å                              | 4.8827(2)                                      |
| b/Å                              | 10.6999(4)                                     |
| c/Å                              | 29.5508(11)                                    |
| $\alpha$ /°                      | 90                                             |
| $\beta$ /°                       | 90                                             |
| $\gamma$ /°                      | 90                                             |
| Volume/Å <sup>3</sup>            | 1543.86(10)                                    |
| Z                                | 4                                              |
| $\rho_{\text{calc}}/\text{cm}^3$ | 1.292                                          |
| $\mu/\text{mm}^{-1}$             | 0.738                                          |
| F(000)                           | 642.2                                          |
| Crystal size/mm <sup>3</sup>     | 0.187 × 0.134 × 0.074                          |
| Radiation                        | Cu K $\alpha$ ( $\lambda$ = 1.54178)           |

|                                                  |                                                              |
|--------------------------------------------------|--------------------------------------------------------------|
| 2 $\Theta$ range for data collection/ $^{\circ}$ | 5.98 to 108.44                                               |
| Index ranges                                     | $-5 \leq h \leq 5, -11 \leq k \leq 11, -31 \leq l \leq 31$   |
| Reflections collected                            | 27266                                                        |
| Independent reflections                          | 942 [ $R_{\text{int}} = 0.0305, R_{\text{sigma}} = 0.0126$ ] |
| Data/restraints/parameters                       | 942/0/103                                                    |
| Goodness-of-fit on $F^2$                         | 1.095                                                        |
| Final R indexes [ $I \geq 2\sigma(I)$ ]          | $R_1 = 0.0307, wR_2 = 0.0805$                                |
| Final R indexes [all data]                       | $R_1 = 0.0318, wR_2 = 0.0824$                                |
| Largest diff. peak/hole / $e \text{ \AA}^{-3}$   | 0.11/-0.10                                                   |

**Table S2.** Crystal data and structure refinement for *Bis(4-allyl-2-methoxyphenyl) carbonate (compound 2)*.

|                                                  |                                                               |
|--------------------------------------------------|---------------------------------------------------------------|
| CCDC Deposition Number                           | 2360346                                                       |
| Empirical formula                                | $C_{21}H_{22}O_5$                                             |
| Formula weight                                   | 354.406                                                       |
| Temperature/K                                    | 100.00                                                        |
| Crystal system                                   | monoclinic                                                    |
| Space group                                      | C2/c                                                          |
| a/ $\text{\AA}$                                  | 15.9421(5)                                                    |
| b/ $\text{\AA}$                                  | 8.6790(3)                                                     |
| c/ $\text{\AA}$                                  | 13.2926(4)                                                    |
| $\alpha/^{\circ}$                                | 90                                                            |
| $\beta/^{\circ}$                                 | 101.624(1)                                                    |
| $\gamma/^{\circ}$                                | 90                                                            |
| Volume/ $\text{\AA}^3$                           | 1801.46(10)                                                   |
| Z                                                | 4                                                             |
| $\rho_{\text{calc}}/\text{g/cm}^3$               | 1.307                                                         |
| $\mu/\text{mm}^{-1}$                             | 0.093                                                         |
| F(000)                                           | 752.5                                                         |
| Crystal size/ $\text{mm}^3$                      | $0.372 \times 0.348 \times 0.244$                             |
| Radiation                                        | Mo $K\alpha$ ( $\lambda = 0.71073$ )                          |
| 2 $\Theta$ range for data collection/ $^{\circ}$ | 5.22 to 50.7                                                  |
| Index ranges                                     | $-19 \leq h \leq 19, -10 \leq k \leq 10, -16 \leq l \leq 16$  |
| Reflections collected                            | 12445                                                         |
| Independent reflections                          | 1644 [ $R_{\text{int}} = 0.0329, R_{\text{sigma}} = 0.0183$ ] |
| Data/restraints/parameters                       | 1644/0/121                                                    |
| Goodness-of-fit on $F^2$                         | 1.092                                                         |
| Final R indexes [ $I \geq 2\sigma(I)$ ]          | $R_1 = 0.0287, wR_2 = 0.0721$                                 |
| Final R indexes [all data]                       | $R_1 = 0.0340, wR_2 = 0.0787$                                 |
| Largest diff. peak/hole / $e \text{ \AA}^{-3}$   | 0.20/-0.17                                                    |

**Table S3.** Crystal data and structure refinement for 2,4,6-tris(4-allyl-2 methoxyphenoxy)-1,3,5-triazine (compound 4).

|                                             |                                                               |
|---------------------------------------------|---------------------------------------------------------------|
| CCDC Deposition Number                      | 2360345                                                       |
| Empirical formula                           | C <sub>33</sub> H <sub>33</sub> N <sub>3</sub> O <sub>6</sub> |
| Formula weight                              | 567.646                                                       |
| Temperature/K                               | 100.00                                                        |
| Crystal system                              | monoclinic                                                    |
| Space group                                 | P2 <sub>1</sub> /n                                            |
| a/Å                                         | 13.0353(5)                                                    |
| b/Å                                         | 11.7214(5)                                                    |
| c/Å                                         | 20.1820(8)                                                    |
| α/°                                         | 90                                                            |
| β/°                                         | 107.691(1)                                                    |
| γ/°                                         | 90                                                            |
| Volume/Å <sup>3</sup>                       | 2937.8(2)                                                     |
| Z                                           | 4                                                             |
| ρ <sub>calc</sub> /cm <sup>3</sup>          | 1.283                                                         |
| μ/mm <sup>-1</sup>                          | 0.089                                                         |
| F(000)                                      | 1200.8                                                        |
| Crystal size/mm <sup>3</sup>                | 0.524 × 0.247 × 0.072                                         |
| Radiation                                   | Mo Kα (λ = 0.71073)                                           |
| 2θ range for data collection/°              | 4.06 to 50.7                                                  |
| Index ranges                                | -15 ≤ h ≤ 15, -14 ≤ k ≤ 14, -24 ≤ l ≤ 24                      |
| Reflections collected                       | 37621                                                         |
| Independent reflections                     | 5374 [R <sub>int</sub> = 0.0443, R <sub>sigma</sub> = 0.0276] |
| Data/restraints/parameters                  | 5374/0/382                                                    |
| Goodness-of-fit on F <sup>2</sup>           | 1.061                                                         |
| Final R indexes [I ≥ 2σ (I)]                | R <sub>1</sub> = 0.0665, wR <sub>2</sub> = 0.1694             |
| Final R indexes [all data]                  | R <sub>1</sub> = 0.0828, wR <sub>2</sub> = 0.1828             |
| Largest diff. peak/hole / e Å <sup>-3</sup> | 1.04/-1.00                                                    |

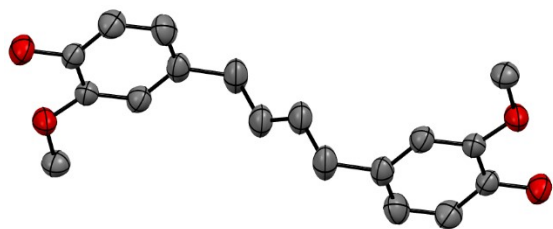

**Figure S12.** Solid-state structure of compound **1** with thermal ellipsoids at the 50% probability level. Hydrogen atoms are omitted for clarity. Grey and red ellipsoids represent C and O atoms, respectively.

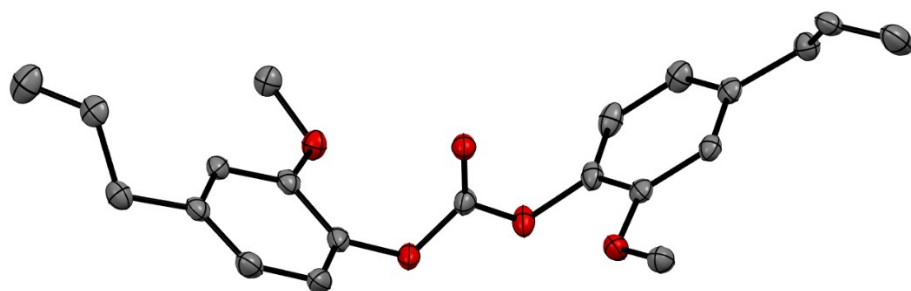

**Figure S13.** Solid-state structure of compound **2** with thermal ellipsoids at the 50% probability level. Hydrogen atoms are omitted for clarity. Grey and red ellipsoids represent C and O atoms, respectively.

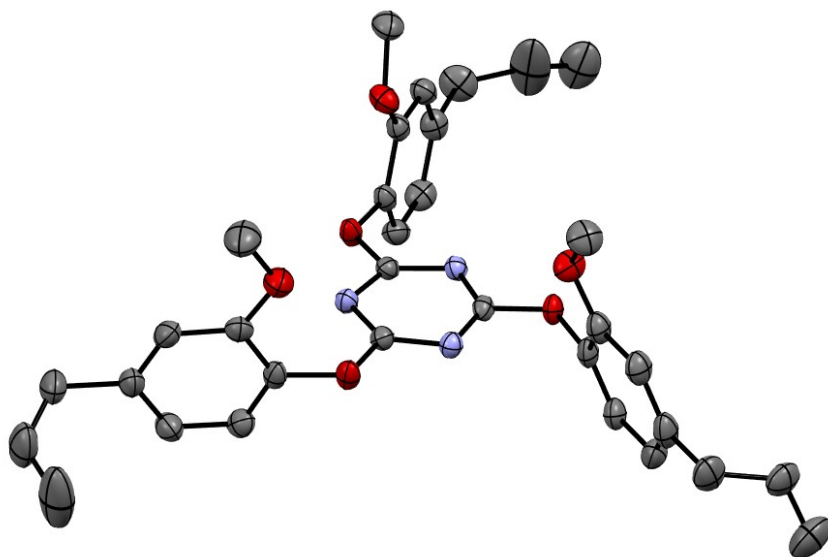

**Figure S14.** Solid-state structure of compound **4** with thermal ellipsoids at the 50% probability level. Hydrogen atoms are omitted for clarity. Grey, blue and red ellipsoids represent C, N and O atoms, respectively.

## References

- (1) Sheldrick, G. M. SHELXT – Integrated Space-Group and Crystal-Structure Determination. *Acta Crystallogr. A* **2015**, *71*, 3–8.
- (2) Sheldrick, G. M. A Short History of SHELX. *Acta Crystallogr. A* **2008**, *64*, 112–122.
- (3) Dolomanov, O. V.; Bourhis, L. J.; Gildea, R. J.; Howard, J. A. K.; Puschmann, H. OLEX2 : A Complete Structure Solution, Refinement and Analysis Program. *J. Appl. Crystallogr.* **2009**, *42* (2), 339–341.
